# Supplementary material
Source: PubMed Central journal article supplement (PMC6384100)

***Bacillus velezensis* wall teichoic acids is required for biofilm formation  
and root colonization**

Zhihui Xu<sup>1†</sup>, Huihui Zhang<sup>1†</sup>, Xinli Sun<sup>1</sup>, Yan Liu<sup>1</sup>, Wuxia Yan<sup>1</sup>, Weibing Xun<sup>1</sup>, Qirong Shen<sup>1</sup>, Ruifu Zhang<sup>1,2\*</sup>

1. Jiangsu Provincial Key Lab for Organic Solid Waste Utilization, National Engineering Research Center for Organic-based Fertilizers, Jiangsu Collaborative Innovation Center for Solid Organic Waste Resource Utilization, Nanjing Agricultural University, 210095, China.
2. Key Laboratory of Microbial Resource Collection and Preservation, Ministry of Agriculture, Institute of Agricultural Resources and Regional Planning, Chinese Academy of Agriculture Sciences, Beijing, China.

Running title: Wall teichoic acids involved in root colonization

<sup>†</sup>Z.X and H.Z contributed equally to this paper.

The authors declare no conflict of interest.

Corresponding author:

Ruifu Zhang

College of Resources and Environmental Sciences, Nanjing Agricultural University, Nanjing, 210095, P.R. China.

E-mail: rfzhang@njau.edu.cn Tel: 86-025-84396477, Fax: 86-025-84396260

Table S1: List of up-regulated proteins of SQR9 and the mutant *sfp* (SQR9: *sfp* > 4). Gene name in the blue color was selected for mutation experiment.

| Protein Name                                                            | Accession number | Unused | Total  | %Cov  | %Cov(50) | %Cov(95) | Peptides (95%) | AVG. (SQR9: $\Delta sfp$ ) | Description                                                                                              |
|-------------------------------------------------------------------------|------------------|--------|--------|-------|----------|----------|----------------|----------------------------|----------------------------------------------------------------------------------------------------------|
| <b>I. Cellular processes and signaling</b>                              |                  |        |        |       |          |          |                |                            |                                                                                                          |
| <b>I.1 Cell wall/membrane/envelope biogenesis</b>                       |                  |        |        |       |          |          |                |                            |                                                                                                          |
| DacA                                                                    | GI:631799371     | 46.03  | 48.69  | 67.95 | 59.37    | 51.02    | 37             | 5.56                       | serine-type D-ala-D-ala carboxypeptidase DacA                                                            |
| <b>GgaA</b>                                                             | GI:631802915     | 41.83  | 42.14  | 67.19 | 54.69    | 43.36    | 35             | 4.41                       | minor teichoic acid biosynthesis protein GgaA                                                            |
| GlmU                                                                    | GI:631799412     | 35.84  | 36.60  | 62.06 | 55.48    | 54.61    | 53             | 8.88                       | bifunctional N-acetylglucosamine-1-phosphate uridyltransferase/glucosamine-1-phosphate acetyltransferase |
| CwlC                                                                    | GI:631801046     | 24.66  | 24.71  | 59.52 | 55.95    | 54.37    | 37             | 4.61                       | sporulation-specific N-acetylmuramoyl-L-alanine amidase CwlC                                             |
| LytC                                                                    | GI:631802906     | 24.45  | 28.79  | 45.77 | 34.68    | 31.45    | 15             | 4.28                       | N-acetylmuramoyl-L-alanine amidase (major autolysin)                                                     |
| <b>I.2 Defense mechanisms</b>                                           |                  |        |        |       |          |          |                |                            |                                                                                                          |
| YocD                                                                    | GI:631801281     | 12.28  | 12.55  | 31.08 | 27.69    | 23.08    | 9              | 6.16                       | putative protein YocD                                                                                    |
| <b>I.3 Posttranslational modification, protein turnover, chaperones</b> |                  |        |        |       |          |          |                |                            |                                                                                                          |
| AhpC                                                                    | GI:631803324     | 17.60  | 24.35  | 83.42 | 73.80    | 70.05    | 29             | 4.80                       | alkyl hydroperoxide reductase subunit C (small subunit) AhpC                                             |
| OhrB                                                                    | GI:631800606     | 13.79  | 14.78  | 75.74 | 64.71    | 61.76    | 13             | 11.59                      | organic hydroperoxide resistance protein                                                                 |
| <b>II. Information storage and processing</b>                           |                  |        |        |       |          |          |                |                            |                                                                                                          |
| <b>II.1 Signal transduction mechanisms</b>                              |                  |        |        |       |          |          |                |                            |                                                                                                          |
| LuxS                                                                    | GI:631802410     | 6.13   | 6.17   | 63.06 | 49.04    | 27.39    | 4              | 8.28                       | catalyzes the hydrolysis of S-ribosylhomocysteine to homocysteine and autoinducer-2                      |
| <b>II.2 Replication, recombination and repair</b>                       |                  |        |        |       |          |          |                |                            |                                                                                                          |
| HupA                                                                    | GI:631801724     | 10.80  | 10.90  | 93.48 | 79.35    | 79.35    | 24             | 23.69                      | DNA-binding protein II HupA                                                                              |
| <b>II.3 Transcription</b>                                               |                  |        |        |       |          |          |                |                            |                                                                                                          |
| RpoC                                                                    | GI:631799472     | 108.35 | 107.81 | 72.81 | 60.13    | 55.63    | 85             | 4.68                       | DNA-directed RNA polymerase subunit beta'                                                                |
| RpoB                                                                    | GI:631799471     | 88.92  | 88.69  | 66.79 | 59.30    | 52.91    | 91             | 5.42                       | DNA-directed RNA polymerase subunit beta                                                                 |
| RpoA                                                                    | GI:631799507     | 22.67  | 22.76  | 45.22 | 39.81    | 37.58    | 15             | 4.08                       | DNA-directed RNA polymerase subunit alpha                                                                |
| <b>II.4 Translation, ribosomal structure and biogenesis</b>             |                  |        |        |       |          |          |                |                            |                                                                                                          |
| GltX                                                                    | GI:631799455     | 17.77  | 19.07  | 46.38 | 31.26    | 24.84    | 11             | 9.33                       | Charges one glutamine molecule and pairs it to its corresponding RNA trinucleotide                       |
| RpH                                                                     | GI:631802191     | 15.31  | 17.78  | 56.33 | 49.80    | 47.35    | 10             | 10.10                      | tRNA nucleotidyltransferase                                                                              |
| RplJ                                                                    | GI:631799468     | 13.33  | 13.39  | 52.41 | 40.96    | 36.14    | 7              | 5.52                       | 50S ribosomal protein L10                                                                                |
| MtnA                                                                    | GI:631800646     | 11.28  | 11.46  | 49.29 | 36.83    | 22.38    | 11             | 5.38                       | involved in methionine salvage pathway                                                                   |
| RplA                                                                    | GI:631799467     | 10.07  | 12.16  | 43.53 | 29.74    | 27.59    | 6              | 4.39                       | the binding site in the mRNA mimics the binding site in the 23S rRNA                                     |
| RplF                                                                    | GI:631799495     | 8.00   | 10.00  | 27.37 | 21.79    | 21.79    | 5              | 6.04                       | 50S ribosomal subunit protein L6                                                                         |
| TsF                                                                     | GI:631800952     | 4.19   | 4.25   | 32.76 | 10.58    | 7.17     | 2              | 8.87                       | EF-Ts; functions during elongation stage of protein translation                                          |

|                                                    |              |       |       |       |       |       |     |       |                                                                                          |
|----------------------------------------------------|--------------|-------|-------|-------|-------|-------|-----|-------|------------------------------------------------------------------------------------------|
| RplQ                                               | GI:631799508 | 3.34  | 5.46  | 25.00 | 11.67 | 11.67 | 3   | 22.28 | 50S ribosomal protein L17                                                                |
| RplR                                               | GI:631799496 | 1.64  | 1.85  | 28.33 | 16.67 | 5.83  | 1   | 7.27  | 50S ribosomal protein L18                                                                |
| <b>III. Metabolism</b>                             |              |       |       |       |       |       |     |       |                                                                                          |
| <b>III.1 Amino acid transport and metabolism</b>   |              |       |       |       |       |       |     |       |                                                                                          |
| MetE                                               | GI:631800614 | 77.00 | 77.07 | 71.92 | 64.57 | 56.04 | 70  | 4.65  | 5-methyltetrahydropteroyltriglutamate--homocysteine S-methyltransferase                  |
| DppE                                               | GI:631800590 | 54.24 | 54.17 | 78.48 | 66.79 | 63.45 | 68  | 6.80  | dipeptide-binding protein DppE precursor                                                 |
| Mpr                                                | GI:631800169 | 41.33 | 41.46 | 73.93 | 71.62 | 67.99 | 264 | 11.64 | extracellular metalloprotease precursorMpr                                               |
| GlnH                                               | GI:631802099 | 35.29 | 38.32 | 78.91 | 71.27 | 66.91 | 49  | 4.09  | glutamine ABC transporter (glutamine-binding protein) GlnH                               |
| AsD                                                | GI:631800977 | 32.14 | 32.18 | 81.21 | 69.36 | 64.16 | 28  | 8.17  | catalyzes the formation of 4-aspartyl phosphate from aspartate 4-semialdehyde            |
| IlvC                                               | GI:631802184 | 29.62 | 29.90 | 72.22 | 65.50 | 58.77 | 32  | 9.21  | ketol-acid reductoisomerase                                                              |
| SpeE                                               | GI:631803094 | 23.62 | 23.64 | 54.71 | 51.45 | 47.10 | 17  | 8.43  | catalyzes the formation of spermidine from putrescine and S-adenosylmethioninamine       |
| IlvD                                               | GI:631801567 | 22.10 | 22.13 | 32.80 | 26.88 | 25.81 | 13  | 4.82  | dihydroxy-acid dehydratase                                                               |
| <b>YyaH</b>                                        | GI:631803417 | 19.94 | 22.04 | 90.48 | 88.89 | 80.16 | 27  | 11.59 | putative protein YyaH                                                                    |
| AroE3                                              | GI:631801705 | 18.74 | 18.83 | 54.91 | 44.63 | 42.06 | 15  | 11.24 | 3-phosphoshikimate 1-carboxyvinyltransferase                                             |
| YjcI                                               | GI:631800500 | 18.53 | 19.26 | 48.26 | 43.97 | 35.92 | 15  | 4.65  | cystathionine gamma-synthase                                                             |
| GcvPA                                              | GI:631801924 | 15.81 | 15.94 | 33.93 | 27.90 | 22.99 | 10  | 6.22  | glycine dehydrogenase subunit 1                                                          |
| GabT                                               | GI:631799737 | 12.23 | 12.37 | 32.87 | 23.45 | 22.53 | 10  | 6.54  | 4-aminobutyrate aminotransferase                                                         |
| MtnE                                               | GI:631800649 | 12.05 | 12.15 | 26.13 | 16.08 | 14.57 | 6   | 11.70 | pyridoxal phosphate-dependent aminotransferase                                           |
| <b>III.2 Carbohydrate transport and metabolism</b> |              |       |       |       |       |       |     |       |                                                                                          |
| TpiA                                               | GI:631802750 | 26.12 | 26.29 | 93.28 | 84.19 | 81.42 | 20  | 9.77  | triosephosphate isomerase                                                                |
| NagB                                               | GI:631802850 | 21.72 | 21.74 | 51.45 | 47.72 | 47.72 | 11  | 5.07  | N-acetylglucosamine-6-phosphate isomerase NagB                                           |
| YxiA                                               | GI:631803273 | 18.28 | 18.34 | 43.80 | 33.12 | 32.26 | 15  | 4.41  | putative protein YxiA                                                                    |
| PtsH                                               | GI:631800685 | 9.68  | 9.78  | 85.23 | 79.55 | 79.55 | 10  | 6.13  | phosphocarrier protein HPr component PtsH                                                |
| FbaA                                               | GI:631803058 | 8.83  | 8.93  | 44.21 | 22.46 | 17.89 | 6   | 4.44  | fructose-bisphosphate aldolase                                                           |
| YpqE                                               | GI:631801666 | 7.16  | 7.21  | 53.57 | 45.24 | 40.48 | 5   | 4.05  | PTS system IIA component YpqE                                                            |
| <b>III.3 Coenzyme transport and metabolism</b>     |              |       |       |       |       |       |     |       |                                                                                          |
| NadA                                               | GI:631802138 | 34.01 | 34.09 | 67.57 | 62.40 | 61.31 | 31  | 6.99  | quinolinate synthetase                                                                   |
| SerC                                               | GI:631800328 | 33.56 | 34.14 | 78.55 | 72.42 | 64.07 | 80  | 5.02  | phosphoserine aminotransferase                                                           |
| HemL                                               | GI:631802167 | 19.16 | 19.24 | 49.88 | 41.72 | 36.36 | 21  | 4.22  | glutamate-1-semialdehyde aminotransferase                                                |
| LipA                                               | GI:631802566 | 17.39 | 17.68 | 62.75 | 45.64 | 35.57 | 11  | 5.62  | lipoyl synthase                                                                          |
| BioB                                               | GI:631801156 | 2.00  | 2.01  | 15.93 | 2.95  | 1.77  | 1   | 85.11 | catalyzes the formation of biotin from dethiobiotin and sulfur 2 S-adenosyl-L-methionine |
| <b>III.4 Energy production and conversion</b>      |              |       |       |       |       |       |     |       |                                                                                          |
| CitB                                               | GI:631801110 | 64.23 | 68.24 | 58.59 | 47.36 | 46.37 | 51  | 4.97  | Catalyzes the conversion of citrate to isocitrate                                        |

|                                                                           |              |       |       |       |       |       |     |       |                                                           |
|---------------------------------------------------------------------------|--------------|-------|-------|-------|-------|-------|-----|-------|-----------------------------------------------------------|
| YugJ                                                                      | GI:631802464 | 42.57 | 45.17 | 66.93 | 60.21 | 59.17 | 33  | 6.16  | NADH-dependent butanol dehydrogenase YugJ                 |
| IcD                                                                       | GI:631802266 | 22.77 | 25.06 | 50.35 | 34.52 | 29.55 | 13  | 8.35  | Converts isocitrate to alpha ketoglutarate                |
| YfhC                                                                      | GI:631800161 | 22.04 | 22.12 | 88.66 | 78.87 | 77.84 | 24  | 4.16  | putative protein YfhC                                     |
| CccB                                                                      | GI:631802871 | 12.10 | 12.36 | 53.98 | 46.90 | 39.82 | 11  | 7.69  | cytochrome c551 (CccB)                                    |
| Fer                                                                       | GI:631801750 | 7.33  | 7.39  | 56.10 | 56.10 | 56.10 | 9   | 5.55  | ferredoxin Fer                                            |
| BkdB                                                                      | GI:631801865 | 6.09  | 6.11  | 25.24 | 12.86 | 10.95 | 3   | 4.37  | branched-chain alpha-keto acid dehydrogenase subunit E2   |
| YdgI                                                                      | GI:631803395 | 6.09  | 6.09  | 29.25 | 18.87 | 18.87 | 4   | 4.17  | NADH dehydrogenase YdgI                                   |
| <b>III.5 Inorganic ion transport and metabolism</b>                       |              |       |       |       |       |       |     |       |                                                           |
| YvgR                                                                      | GI:631802684 | 39.18 | 39.26 | 57.48 | 48.01 | 42.03 | 60  | 6.46  | sulfite reductase (NADPH2) flavoprotein YvgR              |
| YclQ                                                                      | GI:631799730 | 28.83 | 28.97 | 63.69 | 53.82 | 49.36 | 26  | 8.51  | ferrichrome ABC transporter (periplasmic binding protein) |
| <b>III.6 Lipid transport and metabolism</b>                               |              |       |       |       |       |       |     |       |                                                           |
| YvaB                                                                      | GI:631802695 | 27.89 | 27.96 | 82.94 | 82.94 | 82.94 | 45  | 8.42  | FMN-dependent NADH-azoreductase                           |
| <b>III.7 Nucleotide transport and metabolism</b>                          |              |       |       |       |       |       |     |       |                                                           |
| YhcR                                                                      | GI:631800241 | 57.46 | 57.84 | 59.21 | 55.70 | 54.09 | 70  | 5.37  | 5'-nucleotidase YhcR                                      |
| DeoD                                                                      | GI:631801336 | 23.83 | 23.93 | 78.45 | 75.43 | 75.43 | 29  | 7.67  | purine nucleoside phosphorylase                           |
| <b>III.8 Secondary metabolites biosynthesis, transport and catabolism</b> |              |       |       |       |       |       |     |       |                                                           |
| BmyB                                                                      | GI:631801148 | 53.94 | 66.94 | 20.18 | 9.01  | 6.19  | 39  | 8.61  | bacillomycin D synthetase B                               |
| FenB                                                                      | GI:631801176 | 32.79 | 35.31 | 24.37 | 10.57 | 8.46  | 29  | 4.13  | fengycin synthetase B                                     |
| DltA                                                                      | GI:631803204 | 26.03 | 26.68 | 54.08 | 44.33 | 41.75 | 20  | 6.07  | D-alanine--poly(phosphoribitol) ligase subunit 1          |
| FenA                                                                      | GI:631801177 | 21.20 | 25.50 | 19.47 | 8.82  | 5.92  | 23  | 5.74  | fengycin synthetase A                                     |
| DfnJ                                                                      | GI:631801829 | 2.01  | 8.15  | 13.23 | 4.88  | 1.93  | 5   | 8.67  | modular polyketide synthase of type I                     |
| <b>IV. Poorly characterized</b>                                           |              |       |       |       |       |       |     |       |                                                           |
| <b>IV.1 Function unknown</b>                                              |              |       |       |       |       |       |     |       |                                                           |
| YngK                                                                      | GI:631801171 | 59.47 | 59.57 | 75.20 | 68.36 | 63.87 | 115 | 13.85 | putative protein YngK                                     |
| BacB                                                                      | GI:631803125 | 21.49 | 21.52 | 73.31 | 65.25 | 64.83 | 35  | 4.95  | bacilysin synthetase B                                    |
| YbbR                                                                      | GI:631799545 | 16.36 | 16.44 | 39.04 | 29.44 | 26.51 | 10  | 5.85  | putative protein YbbR                                     |
| YuaD                                                                      | GI:631802430 | 7.42  | 7.49  | 32.64 | 32.12 | 32.12 | 5   | 7.36  | putative protein YuaD                                     |
| YloC                                                                      | GI:631800867 | 6.04  | 6.11  | 29.55 | 20.96 | 11.68 | 3   | 4.17  | putative protein YloC                                     |
| YkoV                                                                      | GI:631800630 | 2.01  | 4.41  | 21.50 | 11.26 | 9.90  | 3   | 4.24  | putative protein YkoV                                     |
| FhO                                                                       | GI:631800176 | 2.01  | 2.04  | 13.59 | 3.83  | 2.56  | 3   | 4.23  | putative protein FhO                                      |
| NucB                                                                      | GI:631801025 | 16.4  | 16.91 | 71.53 | 71.53 | 65.97 | 77  | 5.03  | function unknown                                          |
| 9906                                                                      | GI:631799906 | 24.62 | 24.69 | 69.15 | 65.96 | 56.38 | 34  | 21.06 | function unknown                                          |
| 2739                                                                      | GI:631802739 | 33.82 | 34.12 | 74.51 | 67.65 | 56.54 | 94  | 10.14 | function unknown                                          |

---

|                                              |              |       |       |       |       |       |    |       |                                           |
|----------------------------------------------|--------------|-------|-------|-------|-------|-------|----|-------|-------------------------------------------|
| <b>3020</b>                                  | GI:631803020 | 31.77 | 32.75 | 84.65 | 70.61 | 60.53 | 94 | 17.60 | function unknown                          |
| <b>IV.2 General function prediction only</b> |              |       |       |       |       |       |    |       |                                           |
| YmfA                                         | GI:631800980 | 32.83 | 33.05 | 49.55 | 36.04 | 32.61 | 21 | 5.88  | putative protein YmfA                     |
| YvgN                                         | GI:631802680 | 28.63 | 28.65 | 79.71 | 71.74 | 69.57 | 36 | 4.25  | dehydrogenase YvgN                        |
| YvaA                                         | GI:631802694 | 21.77 | 21.83 | 49.42 | 38.73 | 38.73 | 18 | 5.26  | oxidoreductase YvaA                       |
| YkqC                                         | GI:631800745 | 19.57 | 25.13 | 46.67 | 31.17 | 25.59 | 16 | 4.07  | putative protein YkqC                     |
| AdhA                                         | GI:631799867 | 17.73 | 17.81 | 54.15 | 44.13 | 40.40 | 17 | 6.28  | NADP-dependent alcohol dehydrogenase AdhA |
| YhdP                                         | GI:631800274 | 2.00  | 4.01  | 18.24 | 6.53  | 5.63  | 4  | 4.05  | putative protein YhdP                     |

---

Table S2: List of down-regulated proteins of SQR9 and the mutant *sfp* (SQR9: *sfp* < 0.25)

| Protein Name                                                            | Accession number | Unused | Total | %Cov   | %Cov(50) | %Cov(95) | Peptides (95%) | AVG. (SQR9: $\Delta sfp$ ) | Description                                                                         |
|-------------------------------------------------------------------------|------------------|--------|-------|--------|----------|----------|----------------|----------------------------|-------------------------------------------------------------------------------------|
| <b>I. Cellular processes and signaling</b>                              |                  |        |       |        |          |          |                |                            |                                                                                     |
| <b>I.1 Cell motility</b>                                                |                  |        |       |        |          |          |                |                            |                                                                                     |
| Hag                                                                     | GI:631802880     | 38.91  | 39.62 | 100.00 | 97.83    | 93.48    | 184            | 0.02                       | involved in elicitation of plant basal defence                                      |
| <b>I.2 Cell wall/membrane/envelope biogenesis</b>                       |                  |        |       |        |          |          |                |                            |                                                                                     |
| YobO                                                                    | GI:631801087     | 34.51  | 36.73 | 45.47  | 39.50    | 33.91    | 33             | 0.16                       | putative protein YobO                                                               |
| YnfF                                                                    | GI:631801144     | 26.29  | 26.69 | 60.43  | 54.74    | 46.45    | 29             | 0.11                       | putative protein YnfF                                                               |
| Alr                                                                     | GI:631799821     | 3.74   | 7.97  | 15.94  | 8.48     | 7.46     | 5              | 0.19                       | D-alanine racemase Alr                                                              |
| XlyA                                                                    | GI:631800572     | 19.05  | 19.24 | 55.14  | 48.63    | 47.26    | 25             | 0.22                       | N-acetylmuramoyl-L-alanine amidase XlyA precursor (cell wall hydrolase) (Autolysin) |
| XlyB                                                                    | GI:631800552     | 12.50  | 12.85 | 42.27  | 30.60    | 23.66    | 9              | 0.10                       | N-acetylmuramoyl-L-alanine amidase XlyB                                             |
| YbfG                                                                    | GI:631799586     | 3.60   | 5.75  | 13.90  | 6.40     | 3.41     | 3              | 0.19                       | putative protein YbfG                                                               |
| <b>I.3 Defense mechanisms</b>                                           |                  |        |       |        |          |          |                |                            |                                                                                     |
| PenP                                                                    | GI:631800511     | 32.65  | 34.82 | 81.25  | 60.53    | 51.97    | 26             | 0.11                       | beta-lactamase precursor PenP                                                       |
| <b>I.4 Posttranslational modification, protein turnover, chaperones</b> |                  |        |       |        |          |          |                |                            |                                                                                     |
| Vpr                                                                     | GI:631803165     | 62.70  | 68.83 | 70.24  | 58.41    | 52.30    | 99             | 0.06                       | minor extracellular protease Vpr                                                    |
| Pcp                                                                     | GI:631799620     | 23.88  | 27.10 | 94.42  | 87.44    | 84.65    | 27             | 0.12                       | pyrrolidone-carboxylate peptidase                                                   |
| AprX                                                                    | GI:631801029     | 20.26  | 22.51 | 57.24  | 47.29    | 45.48    | 24             | 0.23                       | intracellular alkaline serine proteinase AprX                                       |
| GroES                                                                   | GI:631799931     | 14.82  | 14.93 | 87.23  | 82.98    | 67.02    | 9              | 0.06                       | co-chaperonin GroES                                                                 |
| <b>I.5 Signal transduction mechanisms</b>                               |                  |        |       |        |          |          |                |                            |                                                                                     |
| YceC                                                                    | GI:631799639     | 27.27  | 27.97 | 82.83  | 80.30    | 69.70    | 73             | 0.06                       | tellurium resistance protein YceC                                                   |
| YceD                                                                    | GI:631799640     | 26.63  | 29.03 | 95.34  | 95.34    | 94.82    | 171            | 0.10                       | tellurium resistance protein YceD                                                   |
| YceE                                                                    | GI:631799641     | 10.62  | 12.85 | 67.71  | 67.71    | 55.73    | 59             | 0.14                       | tellurium resistance protein YceE                                                   |
| YdcE                                                                    | GI:631799823     | 6.00   | 6.02  | 51.72  | 44.83    | 44.83    | 3              | 0.03                       | putative protein YdcE                                                               |
| YtvA                                                                    | GI:631802374     | 3.62   | 3.69  | 20.31  | 12.26    | 5.75     | 2              | 0.23                       | putative protein YtvA                                                               |
| RsbS                                                                    | GI:631799825     | 2.00   | 3.62  | 16.53  | 16.53    | 12.40    | 3              | 0.22                       | negative regulator of sigma-B activity (antagonist of RsbT) RsbS                    |
| YqhA                                                                    | GI:631801944     | 2.00   | 2.00  | 22.46  | 10.14    | 3.26     | 1              | 0.17                       | putative protein YqhA                                                               |
| <b>II. Information storage and processing</b>                           |                  |        |       |        |          |          |                |                            |                                                                                     |
| <b>II.1 Replication, recombination and repair</b>                       |                  |        |       |        |          |          |                |                            |                                                                                     |
| Bsn                                                                     | GI:631802582     | 52.60  | 52.63 | 80.62  | 76.82    | 68.17    | 230            | 0.02                       | extracellular ribonuclease precursor Bsn                                            |

|                                                    |              |        |        |       |       |       |     |      |                                                                         |
|----------------------------------------------------|--------------|--------|--------|-------|-------|-------|-----|------|-------------------------------------------------------------------------|
| SSB                                                | GI:631803423 | 18.26  | 18.43  | 75.58 | 54.07 | 51.74 | 40  | 0.16 | single-strand DNA-binding protein (Helix-destabilizing protein) Ssb     |
| YabD                                               | GI:631799401 | 16.77  | 16.90  | 69.53 | 58.98 | 53.91 | 17  | 0.06 | deoxyribonuclease YabD                                                  |
| <b>II.2 Transcription</b>                          |              |        |        |       |       |       |     |      |                                                                         |
| YuaC                                               | GI:631802433 | 8.98   | 9.02   | 41.30 | 35.87 | 33.70 | 6   | 0.11 | putative protein YuaC                                                   |
| Hpr                                                | GI:631800324 | 6.02   | 8.02   | 32.51 | 22.66 | 22.66 | 5   | 0.12 | HTH-type transcriptional regulator Hpr                                  |
| YwhA                                               | GI:631803100 | 5.00   | 5.05   | 50.36 | 33.81 | 33.81 | 5   | 0.18 | transcription regulator YwhA                                            |
| <b>III. Metabolism</b>                             |              |        |        |       |       |       |     |      |                                                                         |
| <b>III.1 Amino acid transport and metabolism</b>   |              |        |        |       |       |       |     |      |                                                                         |
| Ggt                                                | GI:631801244 | 106.04 | 107.50 | 87.59 | 79.93 | 74.66 | 229 | 0.03 | gamma-glutamyltranspeptidase; upregulated by plant exudate              |
| OppA                                               | GI:631800452 | 90.56  | 89.84  | 88.79 | 85.48 | 79.78 | 187 | 0.15 | oligopeptide ABC transporter (binding protein) OppA                     |
| PabC                                               | GI:631799439 | 24.75  | 25.25  | 65.31 | 61.56 | 54.08 | 20  | 0.04 | 4-amino-4-deoxychorismate lyase                                         |
| PucG                                               | GI:631802580 | 23.92  | 26.10  | 61.63 | 53.72 | 48.20 | 15  | 0.14 | purine catabolism protein PucG                                          |
| YhdR                                               | GI:631800276 | 23.28  | 23.36  | 56.35 | 45.94 | 39.34 | 16  | 0.09 | pyridoxal phosphate-dependent aminotransferase                          |
| YetH                                               | GI:631800038 | 13.18  | 13.25  | 75.21 | 74.38 | 74.38 | 11  | 0.03 | putative protein YetH                                                   |
| YwbC                                               | GI:631803195 | 11.97  | 12.12  | 83.46 | 83.46 | 82.68 | 29  | 0.16 | putative protein YwbC                                                   |
| AspB                                               | GI:631801680 | 11.95  | 12.11  | 34.35 | 21.12 | 19.08 | 8   | 0.07 | pyridoxal phosphate-dependent aminotransferase                          |
| AroH                                               | GI:631801714 | 11.53  | 11.71  | 88.19 | 85.04 | 85.04 | 49  | 0.07 | chorismate mutase (isozymes 1 and 2) AroH                               |
| YwkD                                               | GI:631803048 | 5.47   | 5.52   | 26.77 | 22.83 | 22.83 | 4   | 0.05 | putative protein YwkD                                                   |
| <b>III.2 Carbohydrate transport and metabolism</b> |              |        |        |       |       |       |     |      |                                                                         |
| AmyE                                               | GI:631799652 | 54.17  | 54.21  | 65.10 | 61.15 | 59.18 | 74  | 0.07 | alpha-amylase AmyE                                                      |
| Tal                                                | GI:631803057 | 23.80  | 23.88  | 84.43 | 75.00 | 71.70 | 23  | 0.04 | transaldolase                                                           |
| IolH                                               | GI:631803299 | 23.48  | 25.55  | 64.01 | 62.63 | 54.33 | 19  | 0.16 | inositol utilization protein H (IolH)                                   |
| XynD                                               | GI:631801145 | 20.89  | 21.00  | 52.45 | 49.90 | 46.77 | 53  | 0.05 | endo-1,4-beta-xylanase D precursor                                      |
| BglS                                               | GI:631803256 | 15.85  | 15.91  | 54.73 | 53.09 | 46.09 | 37  | 0.04 | pfam00722; glyco_hydro_16; endo-beta-1,3-1,4 glucanase                  |
| GanA                                               | GI:631800515 | 15.53  | 16.83  | 37.30 | 30.81 | 25.68 | 12  | 0.06 | predicted arabinogalactan endo-1,4-beta-galactosidase                   |
| UxaC                                               | GI:631800543 | 10.63  | 10.80  | 25.38 | 20.43 | 12.90 | 6   | 0.18 | glucuronate isomerase                                                   |
| FriC                                               | GI:631799663 | 6.01   | 8.02   | 29.01 | 16.41 | 12.60 | 4   | 0.09 | sugar phosphate isomerase/epimerase                                     |
| <b>III.3 Coenzyme transport and metabolism</b>     |              |        |        |       |       |       |     |      |                                                                         |
| RibH                                               | GI:631801770 | 44.89  | 45.40  | 97.40 | 94.81 | 94.81 | 132 | 0.04 | 6,7-dimethyl-8-ribityllumazine synthase                                 |
| HemE                                               | GI:631800337 | 20.74  | 20.94  | 73.11 | 61.06 | 56.30 | 21  | 0.03 | catalyzes the formation of coproporphyrinogen from uroporphyrinogen III |
| YkvK                                               | GI:631800666 | 12.13  | 12.84  | 85.62 | 81.51 | 69.86 | 8   | 0.05 | 6-pyruvoyl tetrahydrobiopterin synthase homolog YkvK                    |
| FolA                                               | GI:631799441 | 10.01  | 10.02  | 82.50 | 78.33 | 66.67 | 14  | 0.16 | dihydroneopterin aldolase FolA                                          |
| Moab                                               | GI:631802290 | 8.05   | 8.77   | 72.35 | 45.29 | 38.82 | 8   | 0.03 | molybdopterin precursor biosynthesis protein B (Moab)                   |

---

**III.4 Energy production and conversion**

|      |              |       |       |       |       |       |    |      |                                                                     |
|------|--------------|-------|-------|-------|-------|-------|----|------|---------------------------------------------------------------------|
| LpdV | GI:631801868 | 51.52 | 54.59 | 74.42 | 69.34 | 61.95 | 79 | 0.24 | dihydrolipoyl dehydrogenase                                         |
| GlpD | GI:631800252 | 30.18 | 30.59 | 59.46 | 45.23 | 35.14 | 22 | 0.07 | glycerol-3-phosphate dehydrogenase GlpD                             |
| YfkO | GI:631800100 | 26.67 | 26.76 | 80.54 | 67.42 | 64.25 | 40 | 0.05 | NAD(P)H nitroreductase YfkO                                         |
| CitZ | GI:631802267 | 11.03 | 11.25 | 38.98 | 27.15 | 21.77 | 20 | 0.21 | catalyzes the formation of citrate from acetyl-CoA and oxaloacetate |
| YfmT | GI:631800056 | 10.23 | 12.54 | 19.38 | 12.99 | 11.75 | 7  | 0.14 | benzaldehyde dehydrogenase YfmT                                     |

**III.5 Inorganic ion transport and metabolism**

|      |              |       |       |       |       |       |     |      |                                                     |
|------|--------------|-------|-------|-------|-------|-------|-----|------|-----------------------------------------------------|
| FeuA | GI:631799533 | 61.55 | 64.66 | 85.53 | 81.45 | 78.62 | 133 | 0.05 | iron-binding protein FeuA                           |
| SsuA | GI:631800206 | 51.95 | 59.83 | 86.32 | 80.24 | 76.90 | 164 | 0.13 | aliphatic sulfonates binding protein precursor SsuA |
| KatE | GI:631803254 | 39.95 | 40.33 | 38.21 | 32.06 | 31.33 | 25  | 0.14 | catalase KatE                                       |
| Dps  | GI:631802407 | 24.13 | 24.17 | 92.41 | 89.66 | 89.66 | 54  | 0.15 | DNA-protecting protein Dps                          |
| MrgA | GI:631802630 | 6.02  | 9.38  | 73.38 | 48.05 | 44.16 | 10  | 0.17 | metalloregulation DNA-binding stress protein MrgA   |
| YcjH | GI:631800499 | 4.00  | 4.00  | 19.17 | 7.92  | 7.92  | 2   | 0.02 | putative protein YcjH                               |

**III.6 Lipid transport and metabolism**

|      |              |       |       |       |       |       |    |      |                                    |
|------|--------------|-------|-------|-------|-------|-------|----|------|------------------------------------|
| AcpD | GI:631803411 | 17.71 | 17.95 | 69.01 | 59.62 | 51.17 | 16 | 0.03 | FMN-dependent NADH-azoreductase    |
| FabZ | GI:631802984 | 12.38 | 13.11 | 63.83 | 56.74 | 51.77 | 12 | 0.15 | beta-hydroxyacyl-ACP dehydratase   |
| YngJ | GI:631801170 | 8.60  | 8.69  | 30.53 | 22.63 | 17.11 | 6  | 0.08 | Acyl-CoA dehydrogenase YngJ        |
| DfnL | GI:631801827 | 4.05  | 6.08  | 17.11 | 11.08 | 8.68  | 4  | 0.23 | hydroxymethylglutaryl-CoA synthase |

**III.7 Nucleotide transport and metabolism**

|      |              |        |        |       |       |       |     |      |                                                                                              |
|------|--------------|--------|--------|-------|-------|-------|-----|------|----------------------------------------------------------------------------------------------|
| YfkN | GI:631800103 | 218.21 | 218.21 | 84.90 | 80.42 | 76.22 | 472 | 0.02 | multifunctional 2',3'-cyclic-nucleotide 2'-phosphodiesterase/3'-nucleotidase/5'-nucleotidase |
| GuaB | GI:631799370 | 42.07  | 44.15  | 58.61 | 53.48 | 49.80 | 46  | 0.11 | IMP dehydrogenase                                                                            |
| DeoC | GI:631803282 | 20.19  | 22.78  | 73.42 | 65.77 | 61.71 | 17  | 0.16 | deoxyribose-phosphate aldolase DeoC                                                          |
| NrdF | GI:631801044 | 6.93   | 9.08   | 27.05 | 22.80 | 17.93 | 5   | 0.24 | class 1b ribonucleoside-diphosphate reductase subunit beta                                   |
| PyrD | GI:631800853 | 4.00   | 6.00   | 22.19 | 10.29 | 10.29 | 3   | 0.22 | dihydroorotate dehydrogenase                                                                 |

**III.8 Secondary metabolites biosynthesis, transport and catabolism**

|      |              |       |       |       |       |       |   |      |                 |
|------|--------------|-------|-------|-------|-------|-------|---|------|-----------------|
| DhbB | GI:631802523 | 12.02 | 12.05 | 42.86 | 31.49 | 27.92 | 6 | 0.10 | isochorismatase |
|------|--------------|-------|-------|-------|-------|-------|---|------|-----------------|

**IV. Poorly characterized****IV.1 Function unknown**

|      |              |       |       |       |       |       |    |      |                       |
|------|--------------|-------|-------|-------|-------|-------|----|------|-----------------------|
| Ywfl | GI:631803119 | 31.06 | 31.11 | 84.25 | 70.47 | 68.11 | 56 | 0.06 | putative protein Ywfl |
| YxaL | GI:631803318 | 24.42 | 24.47 | 70.60 | 60.24 | 56.87 | 67 | 0.01 | putative protein YxaL |
| YukJ | GI:631802520 | 20.65 | 20.81 | 73.33 | 69.78 | 65.78 | 65 | 0.24 | putative protein YukJ |
| YpuA | GI:631801778 | 15.37 | 15.53 | 53.85 | 44.15 | 39.13 | 20 | 0.09 | putative protein YpuA |

---



|                                              |              |       |       |       |       |       |    |      |                                            |
|----------------------------------------------|--------------|-------|-------|-------|-------|-------|----|------|--------------------------------------------|
| YueB                                         | GI:631802513 | 6.08  | 8.20  | 20.46 | 6.08  | 3.18  | 5  | 0.17 | bacteriophage SPP1 adsorption protein YueB |
| <b>IV.2 General function prediction only</b> |              |       |       |       |       |       |    |      |                                            |
| YmaB                                         | GI:631801045 | 21.55 | 21.61 | 81.07 | 66.99 | 53.40 | 20 | 0.08 | putative protein YmaB                      |
| YraA                                         | GI:631802315 | 20.51 | 21.41 | 91.12 | 87.57 | 81.07 | 32 | 0.15 | putative protein YraA                      |
| YdaG                                         | GI:631799768 | 20.34 | 20.48 | 92.14 | 92.14 | 86.43 | 23 | 0.10 | general stress protein YdaG                |
| YtcJ                                         | GI:631802299 | 12.23 | 17.55 | 32.77 | 24.48 | 19.59 | 12 | 0.11 | putative protein YtcJ                      |
| YkcA                                         | GI:631800580 | 10.60 | 12.93 | 41.46 | 24.37 | 23.10 | 8  | 0.17 | putative protein YkcA                      |
| YhcB                                         | GI:631800226 | 10.56 | 10.61 | 49.72 | 37.85 | 37.85 | 10 | 0.17 | putative protein YhcB                      |
| Hfq                                          | GI:631801039 | 10.23 | 10.26 | 98.63 | 93.15 | 91.78 | 11 | 0.18 | Stimulates the elongation of poly(A) tails |
| YrkL                                         | GI:631799839 | 8.12  | 8.14  | 62.07 | 47.70 | 40.80 | 17 | 0.05 | putative protein YrkL                      |

Figure S1 Quantitative analysis of biofilms with crystal violet staining. OD<sub>600</sub> values of solubilized crystal violet were from pellicle cells at 24h. Error bars indicate the standard deviations based on three different replicated experimental values. Different letters above the bars indicate significant differences ( $p < 0.05$ ).

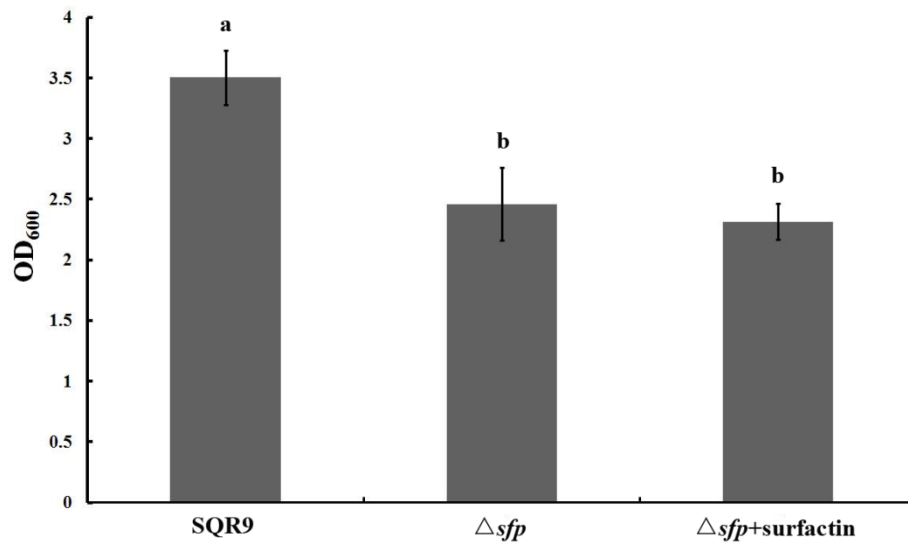

Figure S2 Comparison of biofilm formation after complementary of *ggaA* and *gtaB* gene by qualitative analysis.

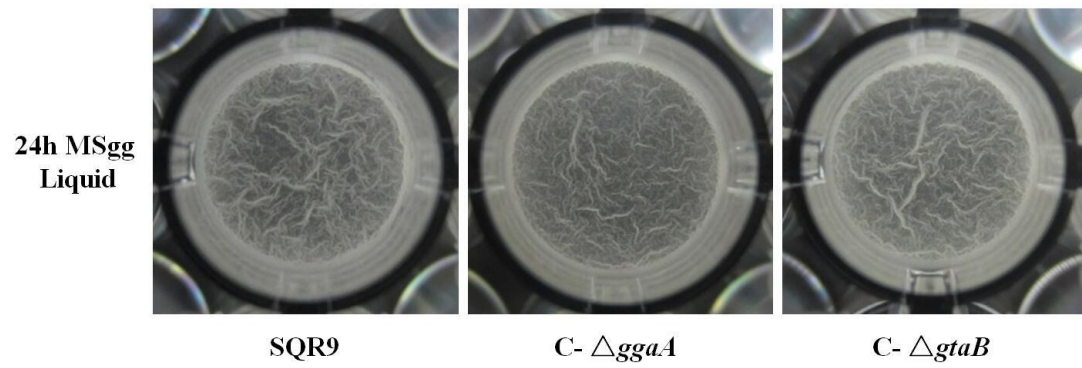

Figure S3 Growth curves of *ggaA*, *gtaB* mutant and wild-type strain of *B. velezensis* SQR9 in liquid MSgg medium.

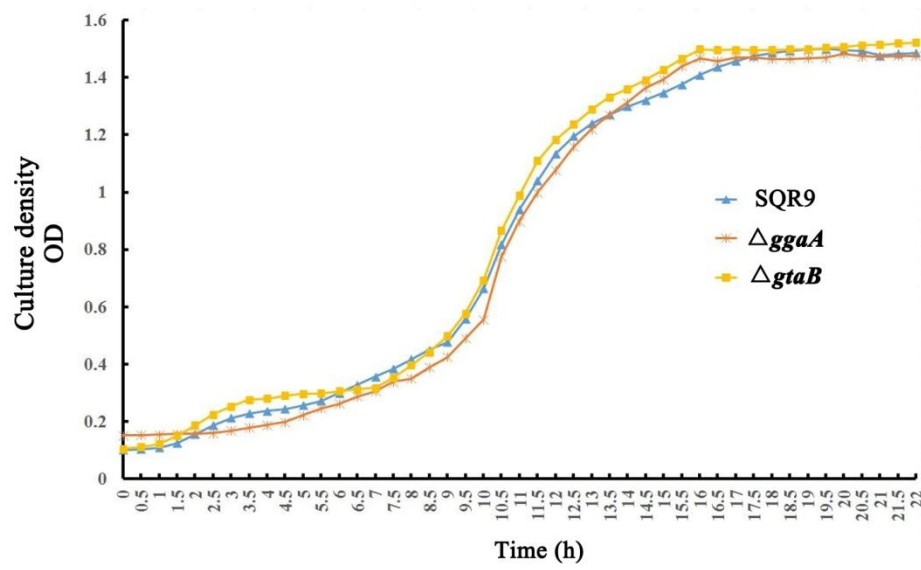

Figure S4 Transcriptional levels of *ggaA* and *gtaB* gene in wild-type strain SQR9. The experiments were carried out with pellicle obtained from microtiter plates when cells were grown in the presence of indicated plant polysaccharides for 24 h. The *B. velezensis* SQR9 *recA* gene was used as an internal reference gene. Bars represent standard deviations of data from three biological replicates.

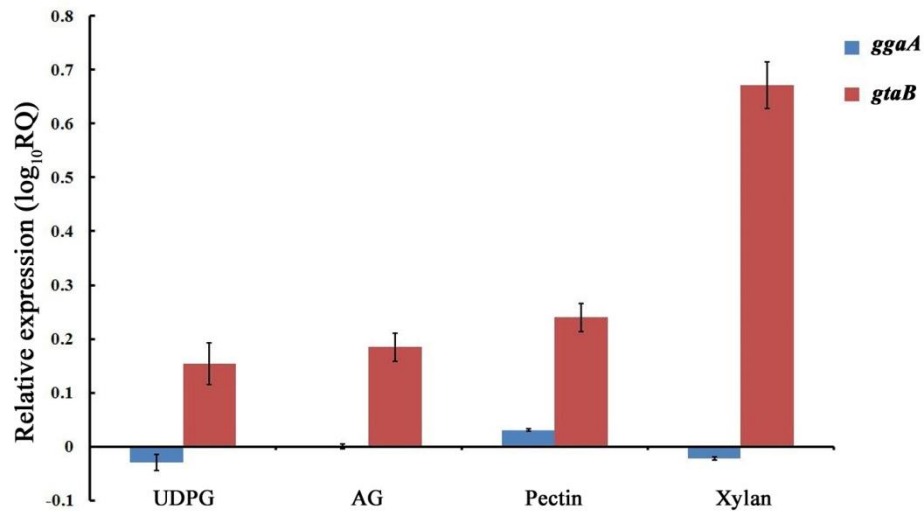

Figure S5 Quantification of EPS production of *ggaA*, *gtaB* mutant and wild-type strain by congo red binding assay. Error bars indicate the standard deviations based on three different replicated experimental values. Different letters above the bars indicate significant differences ( $p < 0.05$ ).

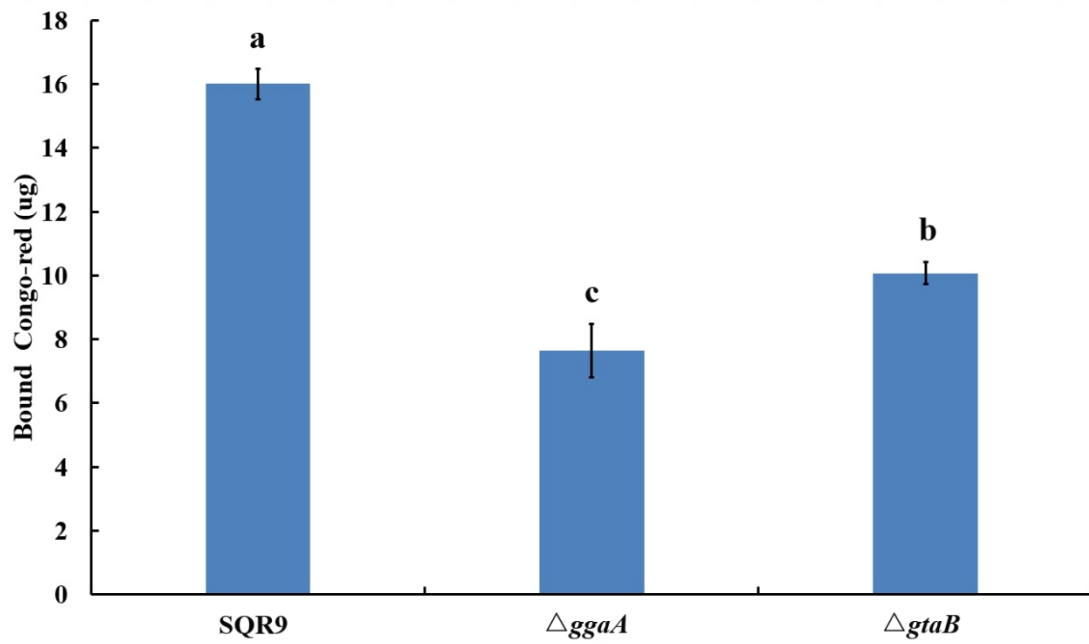

Figure S6 Quantifying attachment of individual strains (*ggaA*, *gtaB* mutant and wild-type strain) to cucumber root surface. Error bars indicate the standard deviations based on three different replicated experimental values. Different letters above the bars indicate significant differences ( $p < 0.05$ ).

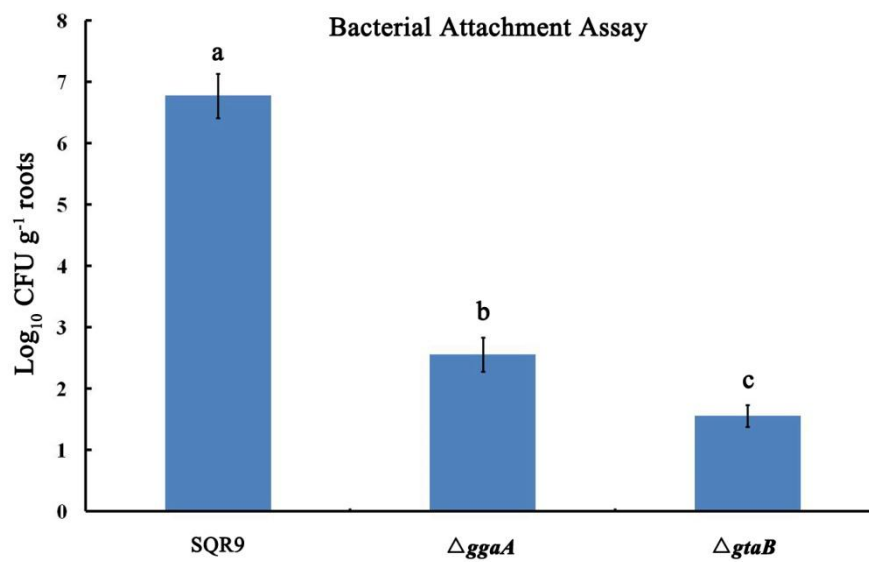

Supplement: AEM.02116-18-s0001.pdf [file AEM.02116-18-s0001.pdf]
